# Supplementary material for: Low rate of nonrelapse mortality in under-4-year-olds with ALL given chemotherapeutic conditioning for HSCT: a phase 3 FORUM study
Source: PubMed Central journal article supplement — Blood Adv. 2023 Sep 26;8(2):416–28. doi: 10.1182/bloodadvances.2023010591 (PMC10827403; doi:10.1182/bloodadvances.2023010591), 2023-09-26
Supplement: BLOODA_ADV-2023-010591-mmc1.pdf [file BLOODA_ADV-2023-010591-mmc1.pdf]

### Appendix 1: Participating countries, centers, and principal investigators

| Country               | Center                                                                | Principal investigator                 |
|-----------------------|-----------------------------------------------------------------------|----------------------------------------|
|                       |                                                                       |                                        |
| <b>Argentina</b>      |                                                                       |                                        |
|                       | Buenos Aires, Hospital de Pediatria Garrahan, POH                     | Raquel Staciuk                         |
| <b>Austria</b>        |                                                                       |                                        |
|                       | Graz, Uniklinik Graz, POH                                             | Wolfgang Schwinger                     |
|                       | Wien, St. Anna Kinderspital, POH                                      | Herbert Pichler                        |
| <b>Australia</b>      |                                                                       |                                        |
|                       | Brisbane, Queensland Children's Hospital (formerly Lady Cilento), POH | Chris Fraser                           |
|                       | Randwick, Sydney Children's Hospital, POH                             | Richard Mitchell                       |
|                       | Westmead, Children's Hospital at Westmead, POH                        | Melissa Gabriel                        |
| <b>Belgium</b>        |                                                                       |                                        |
|                       | Brussels, Cliniques Universitaires Saint-Luc, POH                     | Benedicte Brichard                     |
|                       | Brussels, Hôpital Universitaire des Enfants Reine Fabiola, POH        | Alina Ferster                          |
|                       | Leuven, University Hospital Gasthuisberg (UZ Leuven), POH             | Marleen Renard                         |
| <b>Belarus</b>        |                                                                       |                                        |
|                       | Minsk, Belarusian Research Center, POH                                | Nina Minakovskaya;<br>Dzmity Prudnikau |
| <b>Canada</b>         |                                                                       |                                        |
|                       | Calgary, Alberta Children's Hospital, POH                             | Tony Truong                            |
|                       | Toronto, Hospital for Sick Children, POH                              | Donna Wall                             |
| <b>Switzerland</b>    |                                                                       |                                        |
|                       | Basel, Universitäts-Kinderspital beider Basel , POH                   | Nicolas Von der Weid                   |
|                       | Genf, Universitätsklinik, POH                                         | Marc Ansari                            |
|                       | Zürich, Universitäts-Kinderspital, POH                                | Tayfun Güngör                          |
| <b>Czech Republic</b> |                                                                       |                                        |
|                       | Prague, University Hospital Motol, POH                                | Petr Sedalcek                          |
| <b>Germany</b>        |                                                                       |                                        |
|                       | Berlin, Charité CVK, POH                                              | Hedwig Deubzer                         |
|                       | Düsseldorf, Uniklinik, POH                                            | Roland Meisel                          |
|                       | Erlangen, Uniklinik, POH                                              | Nora Naumann-Bartsch                   |
|                       | Essen, Uniklinik, POH                                                 | Dirk Reinhardt                         |
|                       | Frankfurt, Uniklinik, POH                                             | Peter Bader                            |
|                       | Freiburg, Uniklinik, POH                                              | Brigitte Strahm                        |
|                       | Gießen, Uniklinik, POH                                                | Christine Mauz-Körholz                 |
|                       | Greifswald, Uniklinik, POH                                            | Holger Lode                            |

|                |                                                                                        |                          |
|----------------|----------------------------------------------------------------------------------------|--------------------------|
|                | Hamburg, Universitätsklinikum Hamburg-Eppendorf, POH                                   | Johanna Schrum           |
|                | Hannover, Medizinische Hochschule, POH                                                 | Martin Sauer             |
|                | Jena, Uniklinik, POH                                                                   | Bernd Gruhn              |
|                | Kiel, Universitätsklinikum Schleswig-Holstein, Campus Kiel, POH                        | Gunnar Cario             |
|                | München, Technische Universität München, Schwabing, POH                                | Irene Teichert-Lüttichau |
|                | München, Klinikum der Universität München (LMU), Dr. von Haunersches Kinderspital, POH | Michael Albert           |
|                | Regensburg, Uniklinik, POH                                                             | Anja Tröger              |
|                | Tübingen, Uniklinik, POH                                                               | Peter Lang               |
|                | Ulm, Uniklinik, POH                                                                    | Ansgar Schulz            |
|                | Würzburg, Uniklinik, POH                                                               | Paul Schlegel            |
| <b>Danmark</b> |                                                                                        |                          |
|                | Copenhagen, Rigshospitalet, POH                                                        | Marianne Ifversen        |
| <b>Spain</b>   |                                                                                        |                          |
|                | Murcia, Hospital Clínico Universitario Virgen de La Arrixaca, POH                      | José Luis Fuster         |
| <b>France</b>  |                                                                                        |                          |
|                | Bordeaux, Centre Hospitalier Universitaire, POH                                        | Charlotte Jubert         |
|                | Lille, Hôpital Jeanne de Flandre, POH                                                  | Bénédicte Bruno          |
|                | Lyon, Centre Hospitalier Universitaire Lyon, POH                                       | Yves Bertrand            |
|                | Marseille, Centre Hospitalier Universitaire, POH                                       | Gérard Michel            |
|                | Montpellier, Centre Hospitalier Universitaire, POH                                     | Anne Sirvent             |
|                | Nancy, Centre Hospitalier Universitaire, POH                                           | Cécile Pochon            |
|                | Nantes, Centre Hospitalier Universitaire, POH                                          | Fanny Rialland           |
|                | Paris, Centre Hospitalier Universitaire Robert Debré, POH                              | Jean-Hugues Dalle        |
|                | Rennes, Centre Hospitalier Universitaire Hopital Sud, POH                              | Virginie Gandemer        |
|                | Rouen, Centre Hospitalier Universitaire, POH                                           | Pascale Schneider        |
|                | Strasbourg, Les Hôpitaux Universitaire, POH                                            | Catherine Paillard       |
| <b>Greece</b>  |                                                                                        |                          |
|                | Athens, Aghia Sophia Children's University Hospital, POH                               | Ioulia Peristeri         |
| <b>Croatia</b> |                                                                                        |                          |
|                | Zagreb, University Hospital Centre Zagreb, POH                                         | Ernest Bilic;Toni Matic  |
| <b>Hungary</b> |                                                                                        |                          |
|                | Budapest, St. Istvan and St. Laszlo Hospital, POH                                      | Gergely Krivan           |
| <b>Israel</b>  |                                                                                        |                          |
|                | Haifa, Rambam Health Care Campus, POH                                                  | Roni Gefen               |
|                | Petach Tikvah, Schneider Children's Medical Center, POH                                | Jerry Stein              |
| <b>Italy</b>   |                                                                                        |                          |

|                     |                                                                                                 |                       |
|---------------------|-------------------------------------------------------------------------------------------------|-----------------------|
|                     | Monza, Ospedale S. Gerardo, La Fondazione Monza e Brianza il Bambino e la sua Mamma (MBBM), POH | Adriana Balduzzi      |
|                     | Roma, Ospedale Bambino Gesù, POH                                                                | Franco Locatelli      |
| <b>Norway</b>       |                                                                                                 |                       |
|                     | Oslo, Rikshospitalet, POH                                                                       | Jochen Büchner        |
| <b>New Zealand</b>  |                                                                                                 |                       |
|                     | Auckland, Starship Children's Health, POH                                                       | Lochie Teague         |
| <b>Poland</b>       |                                                                                                 |                       |
|                     | Bydgoszcz, Nicolaus Copernicus University Collegium Medicum, POH                                | Mariusz Wysocki       |
|                     | Poznan, University Hospital, POH                                                                | Jacek Wachowiak       |
|                     | Wroclaw, Klinika Transplantacji Szpiku, POH                                                     | Krzysztof Kalwak      |
| <b>Romania</b>      |                                                                                                 |                       |
|                     | Bucharest, Institutul Clinic Fundeni, POH                                                       | Anca Colita           |
| <b>Saudi Arabia</b> |                                                                                                 |                       |
|                     | Riyadh, King Abdullah Hospital, POH                                                             | Mohammed Essa         |
| <b>Sweden</b>       |                                                                                                 |                       |
|                     | Gothenburg, Queen Silvia Children's Hospital, POH                                               | Cecilia Langenskiöld  |
| <b>Slovakia</b>     |                                                                                                 |                       |
|                     | Bratislava, University Children's Hospital, POH                                                 | Peter Svec            |
| <b>Turkey</b>       |                                                                                                 |                       |
|                     | Ankara, Ankara University School of Medicine, POH                                               | Mehmet Ertem          |
|                     | Ankara, Gazi University School of Medicine, POH                                                 | Ülker Kocak           |
|                     | Antalya, Bahcesehir University School of Medicine, POH                                          | Mehmet Akif Yeşilipek |
|                     | Istanbul, Acibadem University Atakent Hospital, POH                                             | Gulyuz Ozturk         |
|                     | Istanbul, Bahcelievler Medicalpark Hospital, POH                                                | Tunc Fisgin           |
|                     | Istanbul, Bahcesehir University School of Medicine, POH                                         | Gülsün Karasu         |
|                     | Istanbul, Medipol Mega Üniversite Hastanesi, POH                                                | Sema Anak             |
|                     | Izmir, Dokuzeylul University School of Medicine, POH                                            | Hale Ören             |
|                     | Izmir, Ege University School of Medicine, POH                                                   | Serap Aksoylar        |

## Appendix 2: Supplemental data

Table A1: Adverse events according to conditioning regimen

|                                        | Flu/Thio/Bu |           |          |           |           |           |           |            | Flu/Thio/Treo |          |          |           |           |           |           |            |   |
|----------------------------------------|-------------|-----------|----------|-----------|-----------|-----------|-----------|------------|---------------|----------|----------|-----------|-----------|-----------|-----------|------------|---|
|                                        | AE grade    |           |          |           |           |           |           |            | AE grade      |          |          |           |           |           |           |            |   |
|                                        | 0           | 1         | 2        | 3         | 4         | 3/4       |           |            | 0             | 1        | 2        | 3         | 4         | 3/4       |           |            |   |
|                                        | n           | n         | n        | n         | n         | n         | n         | %          | n             | n        | n        | n         | n         | n         | n         | n          | % |
| <b>Hematological toxicities</b>        | <b>98</b>   | <b>12</b> | <b>2</b> | <b>2</b>  | <b>4</b>  | <b>78</b> | <b>82</b> | <b>84%</b> | <b>91</b>     | <b>5</b> | <b>2</b> | <b>4</b>  | <b>2</b>  | <b>78</b> | <b>80</b> | <b>88%</b> |   |
| Reduced Granulocytes                   | 96          | 15        | 2        | 4         | 4         | 71        | 75        | 78%        | 91            | 9        | 1        | 3         | 2         | 76        | 78        | 86%        |   |
| Reduced Hemoglobin                     | 97          | 12        | 3        | 6         | 54        | 22        | 76        | 78%        | 89            | 6        | 1        | 11        | 54        | 17        | 71        | 80%        |   |
| Reduced Leukocytes                     | 97          | 17        | 1        | 2         | 5         | 72        | 77        | 79%        | 91            | 7        | 6        | 1         | 1         | 76        | 77        | 85%        |   |
| Reduced Platelets                      | 97          | 14        | 1        | 3         | 26        | 53        | 79        | 81%        | 89            | 7        | 1        | 4         | 37        | 40        | 77        | 87%        |   |
| Hemolysis                              | 96          | 92        | 2        | 1         | 1         | 0         | 1         | 1%         | 85            | 84       | 0        | 0         | 1         | 0         | 1         | 1%         |   |
| <b>Non-hematological toxicities</b>    | <b>98</b>   | <b>0</b>  | <b>7</b> | <b>15</b> | <b>40</b> | <b>38</b> | <b>78</b> | <b>80%</b> | <b>91</b>     | <b>0</b> | <b>6</b> | <b>22</b> | <b>26</b> | <b>37</b> | <b>63</b> | <b>69%</b> |   |
| Allergic reaction / hypersensitivity   | 97          | 81        | 7        | 7         | 2         | 0         | 2         | 2%         | 84            | 67       | 7        | 10        | 0         | 0         | 0         | 0%         |   |
| Cytokine release syndrome              | 97          | 94        | 0        | 3         | 0         | 0         | 0         | 0%         | 86            | 80       | 2        | 4         | 0         | 0         | 0         | 0%         |   |
| HLH                                    | 97          | 97        | 0        | 0         | 0         | 0         | 0         | 0%         | 85            | 85       | 0        | 0         | 0         | 0         | 0         | 0%         |   |
| PTLD                                   | 97          | 96        | 1        | 0         | 0         | 0         | 0         | 0%         | 86            | 86       | 0        | 0         | 0         | 0         | 0         | 0%         |   |
| Serum sickness                         | 97          | 96        | 0        | 0         | 1         | 0         | 1         | 1%         | 84            | 83       | 1        | 0         | 0         | 0         | 0         | 0%         |   |
| Arrhythmia                             | 97          | 94        | 2        | 1         | 0         | 0         | 0         | 0%         | 86            | 80       | 2        | 2         | 2         | 0         | 2         | 2%         |   |
| Reduced Cardiac function               | 89          | 87        | 1        | 0         | 0         | 1         | 1         | 1%         | 75            | 72       | 1        | 0         | 1         | 1         | 0         | 3%         |   |
| Disseminated intravascular coagulation | 97          | 96        | 0        | 0         | 0         | 1         | 1         | 1%         | 86            | 85       | 0        | 1         | 0         | 0         | 1         | 0%         |   |
| Thrombotic microangiopathy             | 97          | 93        | 4        | 0         | 0         | 0         | 0         | 0%         | 85            | 84       | 0        | 0         | 1         | 0         | 1         | 1%         |   |
| Acute vascular leak syndrome           | 97          | 96        | 0        | 0         | 1         | 0         | 1         | 1%         | 86            | 82       | 1        | 2         | 1         | 0         | 0         | 1%         |   |
| Thrombosis / embolism                  | 97          | 96        | 0        | 1         | 0         | 0         | 0         | 0%         | 86            | 84       | 2        | 0         | 0         | 0         | 5         | 0%         |   |
| Changes in the skin                    | 98          | 38        | 32       | 24        | 4         | 0         | 4         | 4%         | 91            | 31       | 39       | 16        | 4         | 1         | 15        | 5%         |   |
| Diarrhea                               | 97          | 28        | 26       | 29        | 7         | 7         | 14        | 14%        | 91            | 30       | 23       | 23        | 11        | 4         | 7         | 16%        |   |
| Vomiting                               | 97          | 37        | 27       | 25        | 8         | 0         | 8         | 8%         | 91            | 31       | 31       | 22        | 7         | 0         | 37        | 8%         |   |
| Stomatitis                             | 97          | 39        | 7        | 19        | 22        | 10        | 32        | 33%        | 91            | 26       | 19       | 9         | 12        | 25        | 23        | 41%        |   |
| Nausea                                 | 98          | 37        | 14       | 17        | 18        | 12        | 30        | 31%        | 89            | 36       | 13       | 17        | 7         | 16        | 1         | 26%        |   |
| Colitis                                | 98          | 84        | 2        | 8         | 4         | 0         | 4         | 4%         | 85            | 78       | 3        | 3         | 1         | 0         | 0         | 1%         |   |
| Ileus, gastrointestinal                | 98          | 97        | 0        | 1         | 0         | 0         | 0         | 0%         | 85            | 85       | 0        | 0         | 0         | 0         | 1         | 0%         |   |
| CNS hemorrhage                         | 98          | 98        | 0        | 0         | 0         | 0         | 0         | 0%         | 88            | 87       | 0        | 0         | 0         | 1         | 1         | 0%         |   |
| Gastrointestinal hemorrhage            | 98          | 91        | 1        | 4         | 1         | 1         | 2         | 2%         | 86            | 85       | 0        | 0         | 1         | 0         | 0         | 1%         |   |
| Pulmonary hemorrhage                   | 98          | 97        | 0        | 0         | 0         | 1         | 1         | 1%         | 86            | 85       | 0        | 1         | 0         | 0         | 0         | 0%         |   |
| Bladder hemorrhage                     | 98          | 97        | 1        | 0         | 0         | 0         | 0         | 0%         | 86            | 85       | 1        | 0         | 0         | 0         | 0         | 0%         |   |
| Other hemorrhage                       | 98          | 94        | 2        | 2         | 0         | 0         | 0         | 0%         | 86            | 85       | 0        | 1         | 0         | 0         | 2         | 0%         |   |
| Bilirubin elevation                    | 98          | 54        | 17       | 9         | 16        | 2         | 18        | 18%        | 91            | 65       | 16       | 8         | 2         | 0         | 20        | 2%         |   |
| SGOT / SGPT elevation                  | 97          | 30        | 29       | 21        | 12        | 5         | 17        | 17%        | 91            | 22       | 33       | 16        | 16        | 4         | 0         | 22%        |   |
| Liver dysfunction / failure (clinical) | 97          | 90        | 3        | 4         | 0         | 0         | 0         | 0%         | 86            | 85       | 1        | 0         | 0         | 0         | 0         | 0%         |   |
| Pancreatitis                           | 96          | 94        | 2        | 0         | 0         | 0         | 0         | 0%         | 86            | 86       | 0        | 0         | 0         | 0         | 0         | 0%         |   |
| Veno-occlusive disease (VOD) severity  | 97          | 65        | 7        | 13        | 8         | 4         | 12        | 12%        | 87            | 84       | 1        | 2         | 0         | 0         | 9         | 0%         |   |
| Fever                                  | 98          | 18        | 44       | 28        | 7         | 1         | 8         | 8%         | 88            | 11       | 37       | 31        | 9         | 0         | 40        | 10%        |   |
| Infection                              | 98          | 20        | 7        | 30        | 38        | 3         | 41        | 42%        | 91            | 7        | 11       | 33        | 37        | 3         | 0         | 44%        |   |
| Osteonecrosis (avascular necrosis)     | 96          | 96        | 0        | 0         | 0         | 0         | 0         | 0%         | 81            | 81       | 0        | 0         | 0         | 0         | 0         | 0%         |   |
| Peripheral neurotoxicity               | 98          | 94        | 4        | 0         | 0         | 0         | 0         | 0%         | 90            | 87       | 3        | 0         | 0         | 0         | 4         | 0%         |   |
| Central neurotoxicity                  | 98          | 96        | 1        | 0         | 1         | 0         | 1         | 1%         | 91            | 83       | 4        | 0         | 1         | 3         | 1         | 4%         |   |
| Leukoencephalopathy                    | 95          | 95        | 0        | 0         | 0         | 0         | 0         | 0%         | 78            | 77       | 0        | 0         | 1         | 0         | 2         | 1%         |   |
| Encephalopathy                         | 97          | 97        | 0        | 0         | 0         | 0         | 0         | 0%         | 87            | 84       | 0        | 1         | 0         | 2         | 1         | 2%         |   |
| Seizure                                | 98          | 97        | 0        | 1         | 0         | 0         | 0         | 0%         | 87            | 84       | 0        | 2         | 0         | 1         | 11        | 1%         |   |
| Hypoxia                                | 93          | 74        | 0        | 2         | 9         | 8         | 17        | 18%        | 86            | 74       | 0        | 1         | 8         | 3         | 3         | 13%        |   |
| Pneumonitis, pulmonary infiltrates     | 94          | 79        | 5        | 2         | 5         | 3         | 10        | 11%        | 82            | 71       | 4        | 4         | 2         | 1         | 1         | 4%         |   |

|                                                | Flu/Thio/Bu |    |    |   |   |     |   |    | Flu/Thio/Treo |    |    |   |   |     |   |    |
|------------------------------------------------|-------------|----|----|---|---|-----|---|----|---------------|----|----|---|---|-----|---|----|
|                                                | AE grade    |    |    |   |   |     |   |    | AE grade      |    |    |   |   |     |   |    |
|                                                | 0           | 1  | 2  | 3 | 4 | 3/4 |   |    | 0             | 1  | 2  | 3 | 4 | 3/4 |   |    |
|                                                | n           | n  | n  | n | n | n   | n | %  | n             | n  | n  | n | n | n   | n | %  |
| ARDS                                           | 97          | 90 | 0  | 0 | 1 | 6   | 7 | 7% | 84            | 83 | 0  | 0 | 0 | 1   | 1 | 1% |
| Aspiration                                     | 98          | 97 | 0  | 0 | 1 | 0   | 1 | 1% | 85            | 84 | 0  | 0 | 1 | 0   | 0 | 1% |
| Atelectasis                                    | 98          | 94 | 3  | 1 | 0 | 0   | 0 | 0% | 85            | 83 | 2  | 0 | 0 | 0   | 1 | 0% |
| Reduced Kidney function (Creatinine elevation) | 98          | 69 | 21 | 6 | 2 | 0   | 2 | 2% | 90            | 63 | 20 | 6 | 1 | 0   | 0 | 1% |
| Hematuria                                      | 95          | 83 | 10 | 2 | 0 | 0   | 0 | 0% | 82            | 72 | 9  | 1 | 0 | 0   | 0 | 0% |
| Proteinuria                                    | 89          | 81 | 7  | 1 | 0 | 0   | 0 | 0% | 81            | 76 | 5  | 0 | 0 | 0   | 0 | 0% |

ARDS, acute respiratory distress syndrome; HLH, hemophagocytic lymphohistiocytosis; PTLN, post-transplant lymphoproliferative disorder; SGOT, serum glutamic oxaloacetic transaminase; SGPT, serum glutamate pyruvate transaminase. Grading according to Common Terminology Criteria for Adverse Events (CTCAE) Version 4.03

Table A2: Key outcomes according to age group

|                                                             | <2 years old (n = 90) | ≥2 years old (n = P 101) |       |
|-------------------------------------------------------------|-----------------------|--------------------------|-------|
| <b>Death</b>                                                |                       |                          |       |
| Deaths, n                                                   | 26                    | 30                       |       |
| 3-year OS (95% CI)                                          | 0.71 (0.59–0.80)      | 0.68 (0.57–0.76)         | 0.793 |
| <b>Event-free survival</b>                                  |                       |                          |       |
| Events, n                                                   | 44                    | 43                       |       |
| 3-year EFS (95% CI)                                         | 0.48 (0.37–0.59)      | 0.55 (0.44–0.64)         | 0.328 |
| <b>Relapse</b>                                              |                       |                          |       |
| Relapses, n                                                 | 41                    | 37                       |       |
| 3-year CIR (95% CI)                                         | 0.48 (0.37–0.59)      | 0.39 (0.29–0.49)         | 0.166 |
| <b>Non-leukemic death</b>                                   |                       |                          |       |
| Death in CR, n                                              | 3                     | 6                        |       |
| 3-year TRM (95% CI)                                         | 0.03 (0.01–0.09)      | 0.06 (0.02–0.12)         | .402  |
| <b>Acute GvHD by Day 100</b>                                |                       |                          |       |
| Evaluable*, n                                               | 88                    | 101                      |       |
| Grade 0 or 1, n (%)                                         | 69 (78%)              | 76 (75%)                 |       |
| Grade 2, n (%)                                              | 12 (14%)              | 14 (14%)                 |       |
| Grade 3 or 4, n (%)                                         | 7 (8%)                | 11 (11%)                 | 0.493 |
| <b>Chronic GvHD by 2 years</b>                              |                       |                          |       |
| cGvHD/death without cGvHD/patients, n/n/N                   | 4/42/90               | 8/42/101                 |       |
| 3-year cumulative incidence of cGvHD (95% CI)               | 0.03 (0.01–0.09)      | 0.08 (0.04–0.15)         | 0.175 |
| 3-year cumulative incidence of death without cGvHD (95% CI) | 0.50 (0.38–0.6)       | 0.44 (0.34–0.54)         | 0.374 |
| <b>GvHD and relapse</b>                                     |                       |                          |       |
| Events/patients, n/N                                        | 48/91                 | 56/103                   |       |
| 3-year GRFS (95% CI)                                        | 0.42 (0.31–0.52)      | 0.41 (0.31–0.51)         | 0.957 |
| <b>Non-hematologic adverse events of grade 3 or 4</b>       |                       |                          |       |
| Evaluable, n                                                | 89                    | 100                      |       |
| Grade 3 or 4, n (%)                                         | 67 (75%)              | 72 (72%)                 | 0.610 |

14  
15  
16  
17

Table A3: Univariable analysis of OS according to age group

|                                |                   | <2 years  |           |                         |       | ≥2 years   |           |                         |       |
|--------------------------------|-------------------|-----------|-----------|-------------------------|-------|------------|-----------|-------------------------|-------|
|                                |                   | n         | Deaths    | 3-year OS               | P     | n          | Deaths    | 3-year OS               | P     |
| <b>Total</b>                   |                   | <b>90</b> | <b>26</b> | <b>0.71 (0.59–0.80)</b> |       | <b>101</b> | <b>30</b> | <b>0.68 (0.57–0.76)</b> |       |
| <b>Sex</b>                     | Male              | 43        | 12        | 0.71 (0.52–0.84)        | 0.917 | 64         | 19        | 0.68 (0.54–0.79)        | 0.839 |
|                                | Female            | 47        | 14        | 0.71 (0.55–0.82)        |       | 37         | 11        | 0.67 (0.48–0.80)        |       |
| <b>Age at diagnosis</b>        | <1 year           | 75        | 22        | 0.69 (0.56–0.79)        | 0.660 | 17         | 8         | 0.42 (0.15–0.67)        | 0.024 |
|                                | ≥1 year           | 15        | 4         | 0.79 (0.49–0.93)        |       | 84         | 22        | 0.72 (0.60–0.81)        |       |
| <b>Immunophenotype</b>         | BCP               | 76        | 24        | 0.68 (0.55–0.78)        | 0.366 | 80         | 26        | 0.64 (0.51–0.74)        | 0.454 |
|                                | T-cell ALL        | 9         | 2         | 0.76 (0.33–0.94)        |       | 19         | 4         | 0.78 (0.51–0.91)        |       |
|                                | Other             | 5         | 0         |                         |       | 1          | 0         |                         |       |
| <b>MRD pre HSCT</b>            | Low               | 51        | 16        | 0.69 (0.53–0.81)        | 0.471 | 54         | 16        | 0.68 (0.51–0.79)        | 0.513 |
|                                | High              | 20        | 8         | 0.60 (0.32–0.79)        |       | 26         | 11        | 0.56 (0.35–0.73)        |       |
| <b>Genetic aberration</b>      | <i>KMT2A-AFF1</i> | 38        | 15        | 0.58 (0.40–0.73)        | 0.258 | 13         | 6         | 0.44 (0.14–0.70)        | 0.396 |
|                                | <i>ETV6-RUNX1</i> | 2         | 0         | 1.00 (1.00–1.00)        |       | 4          | 1         | 1.00 (1.00–1.00)        |       |
|                                | <i>BCR-ABL</i>    | 2         | 0         | 1.00 (1.00–1.00)        |       | 11         | 3         | 0.73 (0.37–0.90)        |       |
|                                | None of the above | 43        | 11        | 0.75 (0.57–0.87)        |       | 65         | 18        | 0.68 (0.53–0.78)        |       |
| <b>Hyperdiploidy</b>           | No                | 82        | 25        | 0.69 (0.57–0.79)        | 0.170 | 67         | 21        | 0.66 (0.52–0.77)        | 0.412 |
|                                | Yes               | 5         | 0         | 1.00 (1.00–1.00)        |       | 18         | 4         | 0.74 (0.43–0.90)        |       |
| <b>Donor</b>                   | MSD               | 12        | 2         | 0.80 (0.41–0.95)        | 0.441 | 25         | 8         | 0.70 (0.47–0.84)        | 0.756 |
|                                | MD                | 78        | 24        | 0.69 (0.57–0.79)        |       | 76         | 22        | 0.67 (0.54–0.77)        |       |
| <b>Remission status</b>        | CR1               | 76        | 22        | 0.69 (0.56–0.79)        | 0.795 | 63         | 12        | 0.81 (0.67–0.89)        | 0.007 |
|                                | CR2               | 13        | 4         | 0.77 (0.44–0.92)        |       | 37         | 17        | 0.50 (0.32–0.66)        |       |
|                                | CR3               | 1         | 0         | 1.00 (1.00–1.00)        |       | .          | 1         | 1.00 (1.00–1.00)        |       |
| <b>Stem cell source</b>        | BM                | 59        | 15        | 0.75 (0.60–0.85)        | 0.413 | 72         | 22        | 0.67 (0.54–0.77)        | 0.544 |
|                                | PB                | 19        | 6         | 0.66 (0.39–0.84)        |       | 16         | 3         | 0.78 (0.46–0.92)        |       |
|                                | Cord blood        | 12        | 5         | 0.63 (0.27–0.85)        |       | 11         | 5         | 0.53 (0.21–0.77)        |       |
|                                | BM + PB           |           |           |                         |       | 1          | 0         | 1.00 (1.00–1.00)        |       |
| <b>Time of relapse, months</b> | <18               | 11        | 4         | 0.73 (0.37–0.90)        | 0.489 | 21         | 9         | 0.52 (0.27–0.72)        | 0.499 |

|                        |       | <2 years |        |                  |       | ≥2 years |        |                  |       |
|------------------------|-------|----------|--------|------------------|-------|----------|--------|------------------|-------|
|                        |       | n        | Deaths | 3-year OS        | P     | n        | Deaths | 3-year OS        | P     |
|                        | 18–30 | 1        | 0      | 1.00 (1.00–1.00) |       | 14       | 8      | 0.37 (0.12–0.62) |       |
|                        | >30   | 0        |        |                  |       | 1        | 0      | 1.00 (1.00–1.00) |       |
| <b>Type of relapse</b> | BM    | 5        | 0      | 1.00 (1.00–1.00) | 0.007 | 24       | 9      | 0.58 (0.34–0.76) | 0.458 |
|                        | CNS   | 5        | 1      | 0.80 (0.20–0.97) |       | 5        | 3      | 0.27 (0.01–0.69) |       |
|                        | Other | 3        | 3      | 0.33 (0.01–0.77) |       | 8        | 5      | 0.38 (0.09–0.67) |       |

18 BM, bone marrow; PB, peripheral blood.

19  
20  
21  
22

Table A4: Univariable analysis of EFS according to age group

|                                |                   | <2 years  |           |                         |       | ≥2 years   |           |                         |       |
|--------------------------------|-------------------|-----------|-----------|-------------------------|-------|------------|-----------|-------------------------|-------|
|                                |                   | n         | Events    | 3-year EFS              | P     | n          | Events    | 3-year EFS              | P     |
| <b>Total</b>                   |                   | <b>90</b> | <b>44</b> | <b>0.48 (0.37–0.59)</b> |       | <b>101</b> | <b>43</b> | <b>0.55 (0.44–0.64)</b> |       |
| <b>Sex</b>                     | Male              | 43        | 22        | 0.43 (0.27–0.59)        | 0.501 | 64         | 26        | 0.57 (0.43–0.68)        | 0.603 |
|                                | Female            | 47        | 22        | 0.52 (0.37–0.66)        |       | 37         | 17        | 0.50 (0.32–0.66)        |       |
| <b>Age at diagnosis</b>        | <1 year           | 75        | 40        | 0.43 (0.31–0.55)        | 0.091 | 17         | 12        | 0.22 (0.05–0.47)        | 0.001 |
|                                | ≥1 year           | 15        | 4         | 0.73 (0.44–0.89)        |       | 84         | 31        | 0.61 (0.49–0.71)        |       |
| <b>Immunophenotype</b>         | BCP               | 76        | 41        | 0.43 (0.31–0.54)        | 0.091 | 80         | 38        | 0.50 (0.38–0.61)        | 0.418 |
|                                | T-cell ALL        | 9         | 3         | 0.67 (0.28–0.88)        |       | 19         | 6         | 0.67 (0.41–0.84)        |       |
|                                | Other             | 5         | 0         |                         |       | 1          | 0         |                         |       |
| <b>MRD pre HSCT</b>            | Low               | 51        | 25        | 0.49 (0.34–0.62)        | 0.300 | 54         | 24        | 0.52 (0.37–0.65)        | 0.326 |
|                                | High              | 20        | 12        | 0.30 (0.09–0.55)        |       | 26         | 15        | 0.42 (0.23–0.60)        |       |
| <b>Genetic aberration</b>      | <i>KMT2a-AFF1</i> | 38        | 22        | 0.38 (0.21–0.54)        | 0.715 | 13         | 6         | 0.50 (0.20–0.74)        | 0.754 |
|                                | <i>ETV6-RUNX1</i> | 2         | 1         | 0.50 (0.01–0.91)        |       | 4          | 1         | 0.75 (0.13–0.96)        |       |
|                                | <i>BCR-ABL</i>    | 2         | 1         | 0.50 (0.01–0.91)        |       | 11         | 4         | 0.61 (0.25–0.83)        |       |
|                                | None of the above | 43        | 18        | 0.57 (0.41–0.70)        |       | 65         | 28        | 0.54 (0.41–0.66)        |       |
| <b>Hyperdiploidy</b>           | No                | 82        | 41        | 0.47 (0.36–0.58)        | 0.188 | 67         | 30        | 0.52 (0.39–0.64)        | 0.525 |
|                                | Yes               | 5         | 1         | 0.80 (0.20–0.97)        |       | 18         | 7         | 0.60 (0.34–0.79)        |       |
| <b>Donor</b>                   | MSD               | 12        | 2         | 0.81 (0.44–0.95)        | 0.052 | 25         | 12        | 0.48 (0.27–0.67)        | 0.514 |
|                                | MD                | 78        | 42        | 0.44 (0.32–0.55)        |       | 76         | 31        | 0.57 (0.44–0.68)        |       |
| <b>Remission status</b>        | CR1               | 76        | 35        | 0.52 (0.39–0.63)        | 0.153 | 63         | 20        | 0.65 (0.51–0.76)        | 0.018 |
|                                | CR2               | 13        | 9         | 0.28 (0.07–0.54)        |       | 37         | 22        | 0.39 (0.23–0.55)        |       |
|                                | CR3               | 1         | 0         | 1.00 (1.00–1.00)        |       | .          | 1         | 1.00 (1.00–1.00)        |       |
| <b>Stem cell source</b>        | BM                | 59        | 24        | 0.56 (0.41–0.68)        | 0.054 | 72         | 31        | 0.53 (0.40–0.65)        | 0.886 |
|                                | PB                | 19        | 14        | 0.26 (0.10–0.47)        |       | 16         | 7         | 0.55 (0.28–0.76)        |       |
|                                | Cord blood        | 12        | 6         | 0.50 (0.21–0.74)        |       | 11         | 5         | 0.55 (0.23–0.78)        |       |
|                                | BM + PB           |           |           |                         |       | 1          | 0         | 1.00 (1.00–1.00)        |       |
| <b>Time of relapse, months</b> | <18               | 11        | 8         | 0.23 (0.04–0.51)        | 0.252 | 21         | 13        | 0.34 (0.14–0.55)        | 0.517 |
|                                | 18–30             | 1         | 0         | 1.00 (1.00–1.00)        |       | 14         | 9         | 0.36 (0.13–0.59)        |       |



|                        |       | <2 years  |           |                         |       | ≥2 years   |           |                         |       |
|------------------------|-------|-----------|-----------|-------------------------|-------|------------|-----------|-------------------------|-------|
|                        |       | n         | Events    | 3-year EFS              | P     | n          | Events    | 3-year EFS              | P     |
| <b>Total</b>           |       | <b>90</b> | <b>44</b> | <b>0.48 (0.37–0.59)</b> |       | <b>101</b> | <b>43</b> | <b>0.55 (0.44–0.64)</b> |       |
|                        | >30   |           |           |                         |       | 1          | 0         | 1.00 (1.00–1.00)        |       |
| <b>Type of relapse</b> | BM    | 5         | 2         | 0.53 (0.07–0.86)        | 0.042 | 24         | 13        | 0.43 (0.23–0.62)        | 0.211 |
|                        | CNS   | 5         | 4         | 0.20 (0.01–0.58)        |       | 5          | 3         | 0.40 (0.05–0.75)        |       |
|                        | other | 3         | 3         | 0.33 (0.01–0.77)        |       | 8          | 6         | 0.25 (0.04–0.56)        |       |

23  
24

25  
26  
27

Table A5: Adverse events according to age group

| Adverse event                          | <2 years  |          |          |           |           |           |           |            | ≥2 years   |           |          |           |           |           |           |            |
|----------------------------------------|-----------|----------|----------|-----------|-----------|-----------|-----------|------------|------------|-----------|----------|-----------|-----------|-----------|-----------|------------|
|                                        | n         | AE grade |          |           |           |           |           |            | n          | AE grade  |          |           |           |           |           |            |
|                                        |           | 0        | 1        | 2         | 3         | 4         | 3/4       | %          |            | 0         | 1        | 2         | 3         | 4         | 3/4       | %          |
| <b>Hematological toxicities</b>        | <b>89</b> | <b>6</b> | <b>3</b> | <b>2</b>  | <b>2</b>  | <b>76</b> | <b>78</b> | <b>88%</b> | <b>100</b> | <b>11</b> | <b>1</b> | <b>4</b>  | <b>4</b>  | <b>80</b> | <b>84</b> | <b>84%</b> |
| Reduced Granulocytes                   | 88        | 10       | 0        | 2         | 3         | 73        | 76        | 86%        | 99         | 14        | 3        | 5         | 3         | 74        | 77        | 78%        |
| Reduced Hemoglobin                     | 87        | 6        | 3        | 6         | 49        | 23        | 72        | 83%        | 99         | 12        | 1        | 11        | 59        | 16        | 75        | 76%        |
| Reduced Leukocytes                     | 88        | 8        | 3        | 1         | 2         | 74        | 76        | 86%        | 100        | 16        | 4        | 2         | 4         | 74        | 78        | 78%        |
| Reduced Platelets                      | 87        | 8        | 2        | 2         | 28        | 47        | 75        | 86%        | 99         | 13        | 0        | 5         | 35        | 46        | 81        | 82%        |
| Hemolysis                              | 84        | 81       | 2        | 0         | 1         | 0         | 1         | 1%         | 97         | 95        | 0        | 1         | 1         | 0         | 1         | 1%         |
| <b>Non-hematological toxicities</b>    | <b>89</b> | <b>0</b> | <b>5</b> | <b>17</b> | <b>32</b> | <b>35</b> | <b>67</b> | <b>75%</b> | <b>100</b> | <b>0</b>  | <b>8</b> | <b>20</b> | <b>34</b> | <b>38</b> | <b>72</b> | <b>72%</b> |
| Allergic reaction / hypersensitivity   | 86        | 71       | 8        | 6         | 1         | 0         | 1         | 1%         | 95         | 77        | 6        | 11        | 1         | 0         | 1         | 1%         |
| Cytokine release syndrome              | 86        | 84       | 0        | 2         | 0         | 0         | 0         | 0%         | 97         | 90        | 2        | 5         | 0         | 0         | 0         | 0%         |
| HLH                                    | 85        | 85       | 0        | 0         | 0         | 0         | 0         | 0%         | 97         | 97        | 0        | 0         | 0         | 0         | 0         | 0%         |
| PTLD                                   | 86        | 86       | 0        | 0         | 0         | 0         | 0         | 0%         | 97         | 96        | 1        | 0         | 0         | 0         | 0         | 0%         |
| Serum sickness                         | 86        | 84       | 1        | 0         | 1         | 0         | 1         | 1%         | 95         | 95        | 0        | 0         | 0         | 0         | 0         | 0%         |
| Arrhythmia                             | 84        | 81       | 1        | 0         | 2         | 0         | 2         | 2%         | 99         | 93        | 3        | 3         | 0         | 0         | 0         | 0%         |
| Reduced cardiac function               | 63        | 63       | 0        | 0         | 0         | 0         | 0         | 0%         | 68         | 68        | 0        | 0         | 0         | 0         | 0         | 0%         |
| Cardiac function                       | 79        | 77       | 0        | 0         | 0         | 2         | 2         | 3%         | 85         | 82        | 2        | 0         | 1         | 0         | 1         | 1%         |
| Disseminated intravascular coagulation | 86        | 86       | 0        | 0         | 0         | 0         | 0         | 0%         | 97         | 95        | 0        | 1         | 0         | 1         | 1         | 1%         |
| Thrombotic microangiopathy             | 85        | 82       | 3        | 0         | 0         | 0         | 0         | 0%         | 97         | 95        | 1        | 0         | 1         | 0         | 1         | 1%         |
| Acute vascular leak syndrome           | 85        | 82       | 1        | 1         | 1         | 0         | 1         | 1%         | 98         | 96        | 0        | 1         | 1         | 0         | 1         | 1%         |
| Thrombosis / embolism                  | 85        | 84       | 1        | 0         | 0         | 0         | 0         | 0%         | 98         | 96        | 1        | 1         | 0         | 0         | 0         | 0%         |
| Changes in the skin                    | 89        | 31       | 36       | 18        | 3         | 1         | 4         | 4%         | 100        | 38        | 35       | 22        | 5         | 0         | 5         | 5%         |
| Diarrhea                               | 88        | 29       | 18       | 23        | 11        | 7         | 18        | 20%        | 100        | 29        | 31       | 29        | 7         | 4         | 11        | 11%        |
| Vomiting                               | 88        | 30       | 30       | 23        | 5         | 0         | 5         | 6%         | 100        | 38        | 28       | 24        | 10        | 0         | 10        | 10%        |
| Stomatitis                             | 88        | 32       | 12       | 12        | 16        | 16        | 32        | 36%        | 100        | 33        | 14       | 16        | 18        | 19        | 37        | 37%        |
| Nausea                                 | 87        | 35       | 10       | 17        | 10        | 15        | 25        | 29%        | 100        | 38        | 17       | 17        | 15        | 13        | 28        | 28%        |
| Colitis                                | 86        | 77       | 0        | 5         | 4         | 0         | 4         | 5%         | 97         | 85        | 5        | 6         | 1         | 0         | 1         | 1%         |
| Ileus, gastrointestinal                | 86        | 85       | 0        | 1         | 0         | 0         | 0         | 0%         | 97         | 97        | 0        | 0         | 0         | 0         | 0         | 0%         |
| CNS hemorrhage                         | 88        | 88       | 0        | 0         | 0         | 0         | 0         | 0%         | 98         | 97        | 0        | 0         | 0         | 1         | 1         | 1%         |
| Gastrointestinal hemorrhage            | 86        | 82       | 0        | 3         | 1         | 0         | 1         | 1%         | 98         | 94        | 1        | 1         | 1         | 1         | 2         | 2%         |

| Adverse event                          | <2 years |          |    |    |    |   |     |     | ≥2 years |          |    |    |    |     |    |     |
|----------------------------------------|----------|----------|----|----|----|---|-----|-----|----------|----------|----|----|----|-----|----|-----|
|                                        | n        | AE grade |    |    |    |   |     |     | n        | AE grade |    |    |    |     |    |     |
|                                        |          | 0        | 1  | 2  | 3  | 4 | 3/4 | 0   |          | 1        | 2  | 3  | 4  | 3/4 |    |     |
| n                                      | n        | n        | n  | n  | n  | n | %   | n   | n        | n        | n  | n  | n  | %   |    |     |
| Pulmonary hemorrhage                   | 86       | 86       | 0  | 0  | 0  | 0 | 0   | 0%  | 98       | 96       | 0  | 1  | 0  | 1   | 1  | 1%  |
| Bladder hemorrhage                     | 86       | 85       | 1  | 0  | 0  | 0 | 0   | 0%  | 98       | 97       | 1  | 0  | 0  | 0   | 0  | 0%  |
| Other hemorrhage                       | 86       | 84       | 0  | 2  | 0  | 0 | 0   | 0%  | 98       | 95       | 2  | 1  | 0  | 0   | 0  | 0%  |
| Bilirubin                              | 89       | 57       | 16 | 8  | 8  | 0 | 8   | 9%  | 100      | 62       | 17 | 9  | 10 | 2   | 12 | 12% |
| SGOT / SGPT elevation                  | 88       | 26       | 33 | 14 | 12 | 3 | 15  | 17% | 100      | 26       | 29 | 23 | 16 | 6   | 22 | 22% |
| Liver dysfunction / failure (clinical) | 85       | 82       | 2  | 1  | 0  | 0 | 0   | 0%  | 98       | 93       | 2  | 3  | 0  | 0   | 0  | 0%  |
| Pancreatitis                           | 85       | 85       | 0  | 0  | 0  | 0 | 0   | 0%  | 97       | 95       | 2  | 0  | 0  | 0   | 0  | 0%  |
| VOD severity                           | 88       | 0        | 69 | 19 | 0  | 0 | 0   | 0%  | 97       | 0        | 80 | 17 | 0  | 0   | 0  | 0%  |
| Fever                                  | 18       | 0        | 5  | 9  | 2  | 2 | 4   | 22% | 17       | 0        | 3  | 6  | 6  | 2   | 8  | 47% |
| Infection                              | 89       | 12       | 8  | 29 | 36 | 4 | 40  | 45% | 100      | 15       | 10 | 34 | 39 | 2   | 41 | 41% |
| Osteonecrosis (avascular necrosis)     | 86       | 86       | 0  | 0  | 0  | 0 | 0   | 0%  | 91       | 91       | 0  | 0  | 0  | 0   | 0  | 0%  |
| Peripheral neurotoxicity               | 88       | 87       | 1  | 0  | 0  | 0 | 0   | 0%  | 100      | 94       | 6  | 0  | 0  | 0   | 0  | 0%  |
| Central neurotoxicity                  | 89       | 85       | 1  | 0  | 1  | 2 | 3   | 3%  | 100      | 94       | 4  | 0  | 1  | 1   | 2  | 2%  |
| Leukoencephalopathy                    | 82       | 82       | 0  | 0  | 0  | 0 | 0   | 0%  | 91       | 90       | 0  | 0  | 1  | 0   | 1  | 1%  |
| Encephalopathy                         | 87       | 85       | 0  | 1  | 0  | 1 | 1   | 1%  | 97       | 96       | 0  | 0  | 0  | 1   | 1  | 1%  |
| Seizure                                | 87       | 84       | 0  | 2  | 0  | 1 | 1   | 1%  | 98       | 97       | 0  | 1  | 0  | 0   | 0  | 0%  |
| Hypoxia                                | 83       | 69       | 0  | 2  | 6  | 6 | 12  | 14% | 96       | 79       | 0  | 1  | 11 | 5   | 16 | 17% |
| Pneumonitis, pulmonary infiltrates     | 81       | 70       | 1  | 3  | 3  | 4 | 7   | 9%  | 95       | 80       | 8  | 3  | 4  | 0   | 4  | 4%  |
| ARDS                                   | 83       | 78       | 0  | 0  | 1  | 4 | 5   | 6%  | 98       | 95       | 0  | 0  | 0  | 3   | 3  | 3%  |
| Aspiration                             | 85       | 84       | 0  | 0  | 1  | 0 | 1   | 1%  | 98       | 97       | 0  | 0  | 1  | 0   | 1  | 1%  |
| Atelectasis                            | 85       | 82       | 2  | 1  | 0  | 0 | 0   | 0%  | 98       | 95       | 3  | 0  | 0  | 0   | 0  | 0%  |
| Creatinine elevation                   | 89       | 65       | 16 | 6  | 2  | 0 | 2   | 2%  | 99       | 67       | 25 | 6  | 1  | 0   | 1  | 1%  |
| Hematuria                              | 84       | 77       | 7  | 0  | 0  | 0 | 0   | 0%  | 93       | 78       | 12 | 3  | 0  | 0   | 0  | 0%  |
| Proteinuria                            | 79       | 77       | 2  | 0  | 0  | 0 | 0   | 0%  | 91       | 80       | 10 | 1  | 0  | 0   | 0  | 0%  |

28  
29  
30  
31  
32

ARDS, acute respiratory distress syndrome; HLH, hemophagocytic lymphohistiocytosis; PTLN, post-transplant lymphoproliferative disorder; SGOT, serum glutamic oxaloacetic transaminase; SGPT, serum glutamate pyruvate transaminase; VOD, veno-occlusive disease. Grading according to Common Terminology Criteria for Adverse Events (CTCAE) Version 4.03

33  
34  
35  
36

Figure A1: Key outcomes according to age group

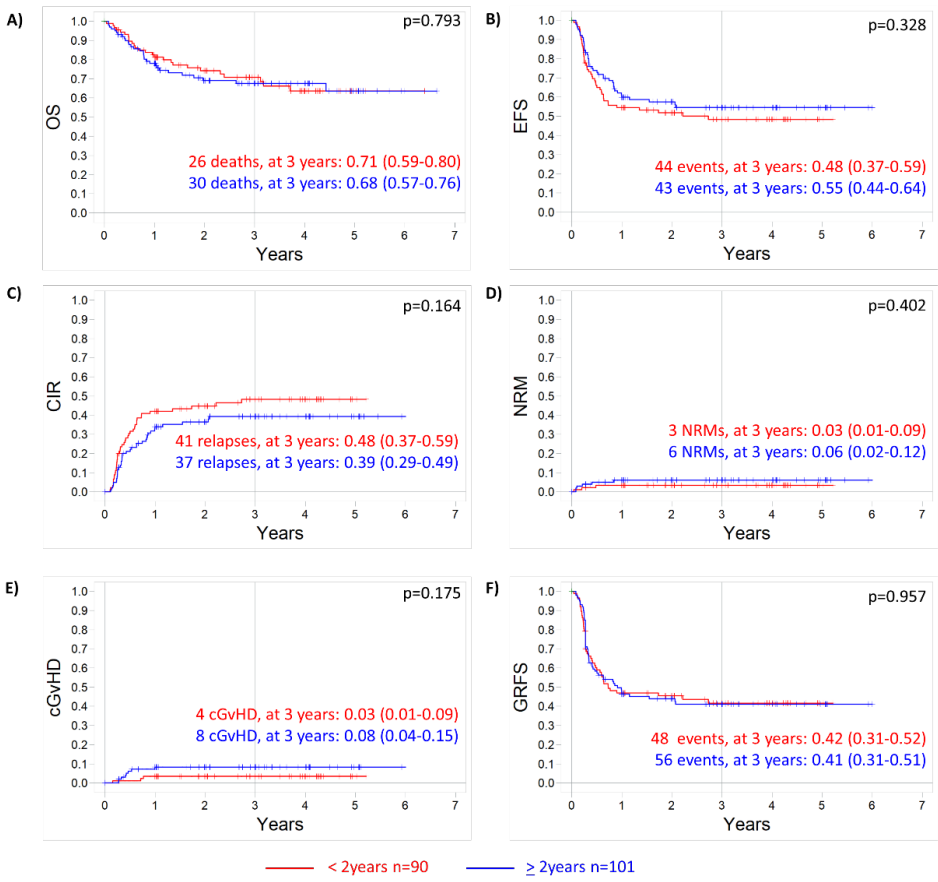

37  
38  
39  
40  
41  
42  
43  
44
